# Supplementary material
Source: publisher site journal article supplement (https://www.dovepress.com/article/361930)
Supplement: Supplementary file 1 [file get_supplementary_file.php]

**SUPPLEMENTARY**

**Supplementary Table 1: Comparison between patients with out of hospital cardiac arrest eligible to uDCD program vs not eligible**

| **Variables** | **Eligible**  **uDCD**  **(N=12)** | **Not Eligible uDCD**  **(N=61)** | **p value** |
| --- | --- | --- | --- |
| **Time to CPR (minutes), median (IQR)** | 14 (02.3-16.0) | 8.3 (2.3-15.0) | 0.48a |
| **Time to emergency room** **(minutes), mean (SD)** | 43.2 (26.4) | 40.2 (22.4) | 0.71b |
| **Duration of CPR (minutes), mean (SD)** | 55 (32.1) | 54.2 (24.4) | 0.92b |
| **Time of cardiac arrest, n (%):** |  |  |  |
| 8:00am to 3:59pm | 7 (58.3) | 27 (44.3) | 0.61c |
| 4:00pm to 11:59pm | 3 (25.0) | 24 (39.3) |
| 0:00am to 7:59am | 2 (16.7) | 10 (16.4) |

aMann-Whitney’s test, bStudent’s t-test, cFisher’s exact test

uDCD = Uncontrolled donation after circulatory death; SD = Standard deviation; CPR = Cardiopulmonary resuscitation; IQR = Interquartile range.
